# **Prolyl Endopeptidase (PREP) is Involved in the Reproductive Functions and Cytoskeletal Organization in Rat Spermatogenesis and in Mammalian Sperm.**

Massimo Venditti<sup>1\*</sup> and Sergio Minucci<sup>1\*</sup>.

<sup>1</sup> Dipartimento di Medicina Sperimentale – Sez. Fisiologia Umana e Funzioni Biologiche Integrate “F. Bottazzi” – Università degli Studi della Campania “Luigi Vanvitelli”, via Costantinopoli 16 – 80138 Napoli – Italy.

Running title: PREP during spermatogenesis of Mammals.

**Keywords: PREP, Tubulin, Testis, First wave of spermatogenesis, Spermatozoa.**

Total number of text figures: 9

\* Correspondence to: \*Massimo Venditti, Dipartimento di Medicina Sperimentale – Sez. Fisiologia Umana e Funzioni Biologiche Integrate “F. Bottazzi”- Università degli Studi della Campania “Luigi Vanvitelli”, via Costantinopoli 16 – 80138 Napoli. TEL: +39 081 5667537, FAX: +39 081 5667500, e-mail: massimo.venditti@unicampania.it

\* Sergio Minucci, Dipartimento di Medicina Sperimentale – Sez. Fisiologia Umana e Funzioni Biologiche Integrate “F. Bottazzi” - Università degli Studi della Campania “Luigi Vanvitelli”, via Costantinopoli 16 – 80138 Napoli. TEL: +39 081 5665829, FAX: +39 081 5667500, e-mail: sergio.minucci@unicampania.it

## **Summary statement**

In this paper we show the co-localization of the enzyme PREP with tubulin during the first wave of rat spermatogenesis and in mature gametes of rat and human.

## Abstract

1 Prolyl endopeptidase (PREP) is an enzyme which cleaves several peptide hormones and  
2 neuropeptides at the carboxyl side of proline residues, involved in many biological processes,  
3 including cell proliferation and differentiation, glucose metabolism, learning, memory and cognitive  
4 disorders. Moreover, PREP was identified as binding partner of tubulin, suggesting that this  
5 endopeptidase may be involved in microtubule-associate processes, independent of its peptidase  
6 activity. Several reports have also suggested PREP participation in both male and female  
7 reproduction-associated processes. In this work, we assessed the possible association of PREP with  
8 the morphogenesis of rat testis, profiling its localization versus tubulin, during the first wave of  
9 spermatogenesis and in the adult gonad (from 7 to 60 dpp). Here we show that, in mitotic phases,  
10 PREP shares its localization with tubulin in Sertoli cells, gonocytes and spermatogonia. Later,  
11 during meiosis, both proteins are found in spermatocytes, and in the cytoplasm of Sertoli cells  
12 protrusions, which surround the germ cells, while, during spermiogenesis, they both localize in the  
13 cytoplasm of round and elongating spermatids. Finally, they are expressed in the flagellum of  
14 mature gametes, as corroborated by additional immunolocalization analysis on both rat and human  
15 sperm. Our data strongly support the hypothesis of a role of PREP in supporting a correct  
16 reproductive function and in cytoskeletal organization during Mammalian testis morphogenesis and  
17 gamete progression, while also hinting at its possible investigation as a morphological marker of  
18 germ cell and sperm physiology.

## 19 **Introduction**

20 Prolyl endopeptidase (PREP; EC 3.4.21.26) is a protein belonging to the serine protease  
21 family, widely conserved through evolution (Venäläinen et al., 2004). It was identified for the first  
22 time in the human uterus (Walter et al. 1971), but soon detected in all mammalian tissues, including  
23 liver, kidney, heart, spleen, and brain, where it shows the highest enzymatic activity (Yoshimoto et  
24 al., 1979; Taylor et al., 1980). PREP has a typical endopeptidase structure, including the catalytic  
25 triad formed by Ser554, Asp641 and His680 (Rea and Fülöp, 2006). PREP is able to hydrolyze the  
26 peptide bond on the carboxyl side of proline residues in oligopeptides comprising no more than  
27 about 30 amino acid residues (Szeltner and Polgár, 2008), as well as peptide hormones and  
28 neuropeptides (Mentlein, 1988; Wilk, 1983). Despite its common cytosolic localization and the  
29 lacks of a secretion signal or a lipid anchor sequence (Venäläinen et al, 2004), it is believed that  
30 PREP may be released from the cells and act outside by inactivating extracellular neuropeptides  
31 (Ahmed et al., 2005). PREP has been implicated in several biological processes, including cell  
32 proliferation and differentiation (Matsubara et al., 1998; Suzuki et al., 2014), cell death (Bär et al.,  
33 2006; Matsuda et al., 2013), glucose metabolism (Kim et al., 2014), celiac disease (Siegel et al.,  
34 2006; Comino et al., 2013), learning and memory (Irazusta et al., 2002; D’Agostino et al., 2013)  
35 and cognitive disorders (Rossner et al., 2005; Hannula et al., 2013). Further reports about the  
36 intracellular activity of PREP suggested an additional physiological role for this enzyme (Schulz et  
37 al., 2005). Indeed, PREP was identified as binding partner of tubulin, indicating novel functions for  
38 PREP in vesicle transport and protein secretion (Morawski et al., 2011). As well known,  
39 microtubules are highly dynamic cytoskeletal components that play fundamental roles in many  
40 cellular processes, such as motility, intracellular transport, division and cell shape (Jordan and  
41 Wilson, 2004; Conde and Cáceres, 2009; Helmke et al., 2013). Since cytoskeletal remodeling is a  
42 critical feature which allows the cell to modulate its shape and architecture, the study of its actors  
43 during gametogenesis and reproduction is of great interest, as the germinal compartment and the  
44 germ cells undergo a complex series of transformations throughout the process (Venditti and  
45 Minucci, 2017), led by heavy cytoskeletal elements organization (Lie et al., 2010). So far, only a  
46 few reports have already suggested PREP participation in both male and female reproduction-  
47 associated processes (Kimura et al., 1998; Kimura et al., 2002; Dotolo et al., 2016). Thus, in this  
48 work, we assessed the possible association of PREP with the morphogenesis of rat testis, by  
49 studying and comparing its expression and localization with tubulin, during the first wave of  
50 spermatogenesis and in the adult tissue. We also extended our profile to rat and human  
51 spermatozoa, in order to further enhance such profile and to clarify PREP distribution in mature  
52 gametes.

## 53 **Materials and Methods**

### 54 **Animal care, tissue extraction, and collection of rat spermatozoa**

55 Male Sprague–Dawley rats (*Rattus norvegicus*) were housed under definite conditions  
56 (12D:12L) and they were fed with standard food and provided with water *ad libitum*. Animals at  
57 different development stages (7 days post-partum, 14, 21, 28, 35, 42, 60 dpp, and adult) were  
58 sacrificed by decapitation under Ketamine anaesthesia (100 mg/kg i.p.) in accordance with national  
59 and local guidelines covering experimental animals. For each animal testes were dissected; one  
60 testis was fixed in Bouin's fluid and embedded in paraffin for histological analysis, one was quickly  
61 frozen by immersion in liquid nitrogen and stored at -80°C until protein extraction. Additionally,  
62 epididymides were removed from adult rats and minced in phosphate buffer saline, PBS (13.6 mM  
63 NaCl; 2.68 mM KCl; 8.08 mM Na<sub>2</sub>HPO<sub>4</sub>; 18.4 mM KH<sub>2</sub>PO<sub>4</sub>; 0.9 mM CaCl<sub>2</sub>; 0.5 mM MgCl<sub>2</sub>; pH  
64 7.4) to let the spermatozoa (SPZ) flow out from the ducts. Then, the fluid samples were filtered and  
65 examined under a light microscope to exclude contamination by other cell types. Next, aliquots  
66 were spotted and air-dried on slides, then stored at - 20°C, while the remaining samples were  
67 centrifuged at 1,000g for 15 min at 4°C and stored at - 80°C until protein extraction.

68

### 69 **Collection of human spermatozoa**

70 Human sperm from qualified donors was centrifuged at 800g for 10 min; the supernatant  
71 was removed and the pellet was washed and resuspended in PBS. The samples were examined  
72 under a light microscope and aliquots were spotted and air-dried on slides, then stored at - 20°C,  
73 while the remaining samples were centrifuged at 1,000g for 15 min at 4°C and stored at 80°C until  
74 protein extraction.

75

### 76 **Preparation of total protein extracts and Western blot analysis**

77 The testes and SPZ (from rat or human) were lysed in a specific buffer (1% NP-40, 0.1%  
78 SDS, 100 mM sodium ortovanadate, 0.5% sodium deoxycholate in PBS) in the presence of protease  
79 inhibitors (4 mg/ml of leupeptin, aprotinin, pepstatin A, chymostatin, PMSF, and 5 mg/ml of  
80 TPCK). The homogenates were sonicated twice by three strokes (20 Hz for 20 s each); after  
81 centrifugation for 30 min at 10,000g, the supernatants were stored at - 80°C. Proteins from testis  
82 and SPZ (50 µg) were separated by 9% SDS-PAGE and transferred to Hybond-P polyvinylidene  
83 difluoride (PVDF) membranes (Amersham Pharmacia Biotech, Buckinghamshire, UK) at 280 mA  
84 for 2.5 h at 4°C. The filters were treated for 3 h with blocking solution [5% skim milk in TBS (10  
85 mM Tris–HCl pH 7.6, 150mM NaCl)] containing 0.25% Tween-20 (Sigma–Aldrich Corp., Milan,  
86 Italy) before the addition of anti-PREP (Abcam Cat #ab58988), or anti-Tubulin (Sigma–Aldrich

87 Corp., Milan, Italy) antibody diluted 1: 5,000 and 1: 10,000 respectively, and incubated overnight at  
88 4°C. After three washes in TBST (TBS including 0.1% Tween20), the filters were incubated with  
89 horseradish peroxidase-conjugated anti-rabbit IgG (Sigma–Aldrich Corp., Milan, Italy) for the  
90 rabbit anti-PREP antibody, or anti-mouse IgG (Sigma–Aldrich Corp., Milan, Italy) for the mouse  
91 anti-Tubulin antibody, both diluted 1: 10,000 in the blocking solution. Then, the filters were washed  
92 again three times in TBST and the immunocomplexes were revealed using the ECL-Western  
93 blotting detection system (Amersham Pharmacia Biotech).

94

### 95 **Tissue quality control and classification of testicular cell types**

96 In order to assess the quality of the tissue samples and their staging, 7 mm-thick rat testis  
97 sections of all samples (7, 14, 21, 28, 35, 42, 60 dpp) were prepared and a haematoxylin-eosin  
98 staining was performed (see Fig. 1). The cell types for each time point were characterized and  
99 confirmed following previously reported classifications (Picut et al., 2015; Pariente et al., 2016).

100

### 101 **Immunofluorescence analysis on rat testis**

102 For PREP co-localization with both Tubulin and the acrosome system, 7 mm-testis sections  
103 were dewaxed, rehydrated, and processed as described by Venditti et al. (2018). Antigen retrieval  
104 was performed by pressure cooking slides for 3 min in 0.01 M citrate buffer (pH 6.0). Then, the  
105 slides were incubated with 0.1% (v/v) Triton X-100 in PBS for 30 min. Later, nonspecific binding  
106 sites were blocked with an appropriate normal serum diluted 1:5 in PBS containing 5% (w/v) BSA  
107 before the addition of anti-PREP, or anti-Tubulin antibody diluted 1:100, for overnight incubation  
108 at 4°C. After washing in PBS, slides were incubated for 1 h with the appropriate secondary  
109 antibody (Anti-Rabbit Alexa Fluor 488, Invitrogen; FITC-Jackson, ImmunoResearch, Pero MI,  
110 Italy; Anti-Mouse IgG 568, Sigma-Aldrich, Milan, Italy) diluted 1:500 in the blocking mixture and  
111 with PNA lectin (Alexa Fluor 568, Invitrogen, Monza MB, Italy) diluted 1:50. The slides were  
112 mounted with Vectashield + DAPI (Vector Laboratories, Peterborough, UK) for nuclear staining,  
113 and then observed with a microscope then observed under the optical microscope (Leica DM 5000  
114 B + CTR 5000) and images were viewed and saved with IM 1000.

115

### 116 **Immunofluorescence analysis on SPZ**

117 To determine PREP and Tubulin co-localization in rat and human SPZ, the samples were  
118 firstly fixed in 4% paraformaldehyde in PBS, and then washed in phosphate buffer (0.01 M PBS,  
119 pH 7.4). The slides were incubated with 0.1% (v/v) Triton X-100 in PBS for 30 min. Later,  
120 nonspecific binding sites were blocked with an appropriate normal serum diluted 1:5 in PBS

121 containing 5% (w/v) BSA before the addition of the primary antibody (PREP and Tubulin), as  
122 described above, and overnight incubation at 4°C. After washing in PBS, slides were incubated for  
123 1 h with the appropriate secondary antibody (Anti-Rabbit Alexa Fluor 488, Invitrogen; FITC-  
124 Jackson, ImmunoResearch, Pero MI, Italy; Anti-Mouse IgG 568, Sigma-Aldrich, Milan, Italy)  
125 diluted 1:500 in the blocking mixture and with PNA lectin (Alexa Fluor 568, Invitrogen, Monza  
126 MB, Italy) diluted 1:50. The slides were mounted with Vectashield + DAPI (Vector Laboratories)  
127 for nuclear staining, then observed under the optical microscope (Leica DM 5000 B + CTR 5000)  
128 with UV lamp, and images were viewed and saved with IM 1000.

129

## 130 **Results**

### 131 **Expression of PREP and Tubulin during the post-natal development of rat testis**

132 The expression of PREP during the postnatal development of the gonad was assessed by  
133 Western Blot analysis on protein extracts from some of the most representative time points during  
134 the first wave of spermatogenesis: 7 dpp (transition of gonocytes from tubule lumen toward the  
135 base; 14 dpp (proliferation of Sertoli cells and A and B spermatogonia, before meiosis); 21 dpp  
136 (presence of spermatocytes, which undertake meiosis; first phases of blood-testis barrier formation);  
137 28 dpp (conclusion of “first wave” meiosis, completion of the blood-testis barrier); 35 dpp  
138 (presence of newly-formed round spermatids in spermiogenesis); 42 dpp (final steps of  
139 spermiogenesis); 60 dpp (mature testis; presence of spermatozoa and of all the characteristic  
140 germ cell associations). A band of the expected size (80 kDa) was detected for PREP in all samples  
141 (Fig. 2). The same time-point progression was employed for the analysis of Tubulin. As expected,  
142 bands were detected in all samples, as a confirmation of the expression of this cytoskeletal protein  
143 during testis development (Fig. 2).

144

### 145 **Localization of PREP during the post-natal development of rat testis**

146 First, tissue quality and staging were checked by performing a haematoxylin-eosin staining  
147 on sections of rat testis at the same time points as described in the previous paragraph (Fig. 1).  
148 PREP localization was studied by immunofluorescence analysis on developing testis sections (7,  
149 14, 21, 28 dpp, Fig. 3; 35, 42, and 60 dpp, Fig. 4). At 7 dpp (Fig. 3 A-C), the protein signal was  
150 localized in Sertoli cell (SC) cytoplasm, but also detectable in luminal gonocytes (Fig. 3 B, C) and  
151 peritubular cells; at 14 dpp (Fig. 3 D-F), the signal was still localized in SC, and it was evident in A  
152 and B spermatogonia (SPG; Fig. 3 E-F). At 21-28 dpp (Fig. 3 G-L) it was detectable inside the  
153 cytoplasm of meiotic I spermatocytes (SPC; Fig. 3 H, I, K, L, better highlighted by the insets), as  
154 well as SC. During spermiogenesis, as shown from 28 dpp onward, it was possible to highlight the

155 occurring acrosome formation, thanks to PNA lectin staining (Fig. 3 J-L, P; Fig. 3). In 35 dpp  
156 tubules (Fig. 4 A-C) PREP signal was detectable in the cytoplasm of SC, which extends from the  
157 base to the lumen, surrounding the germ cells (Fig. 4 A-C and insets). Then, the protein localized in  
158 elongating SPT at 42 dpp and was also detectable SC cytoplasm (Fig. 4 D-F). Finally, at 60 dpp  
159 (Fig. 4 G-I), after the conclusion of the first spermatogenic wave, the signal was comparable to  
160 the one seen at 42 dpp, with the protein present in elongating spermatids and SC cytoplasm.

161

### 162 **Co-localization of PREP and Tubulin during the post-natal development of rat testis**

163 Given PREP association with Tubulin, the co-localization profile of the two proteins was  
164 performed on the same time-point described above. The immunofluorescence analysis showed that  
165 Tubulin signals resulted in a pattern comparable with PREP localization: Tubulin (Fig.5 and 6) was  
166 expressed in all stages and, to varying extent, by all cell types, but it was especially represented  
167 inside the somatic SC which nurse the mitotic and meiotic cells during the first phases of  
168 spermatogenesis (Fig. 5), as well as the SPT during their differentiation into SPZ (Fig. 6). PREP  
169 and Tubulin initially co-localize within GC junctions (Fig. 5 C, F and I). From 28 dpp on they both  
170 are present inside SC cytoplasm, which surrounds the developing GC (Fig. 5 L, and Fig. 8 C, F), as  
171 well as, during spermiogenesis, in SPT, and in the epithelial cells which rearrange their  
172 architecture to support the path of the evolving germ cells (GC) toward the lumen (Fig. 6 F and I).

173

### 174 **Expression of PREP and Tubulin in rat and human spermatozoa**

175 The expression of PREP and Tubulin in rat and human SPZ was assessed by Western Blot  
176 on protein extracts from epididymal and ejaculated SPZ, respectively (Fig. 7). The data confirmed  
177 the presence of the two proteins in male gametes of both species.

178

### 179 **Co-localization of PREP and Tubulin in rat and human spermatozoa**

180 In order to further expand the profile of PREP localization in male gametes, an  
181 immunofluorescence analysis was carried out on rat epididymal SPZ (Fig. 8): there, the protein was  
182 mainly detectable inside the flagellum (Fig. 8, C, E), where it clearly co-localize with Tubulin (Fig.  
183 8, D, F). To obtain more detailed data about PREP expression profile in gametes, we extended the  
184 analysis on human ejaculated SPZ (Fig. 9). The signal in human gametes confirmed PREP presence  
185 inside the flagellum (Fig. 9, C, E), with a weaker signal in the midpiece. Also in this case, PREP  
186 and Tubulin co-localize within the flagellum (Fig. 9, D, F), showing a comparable expression  
187 pattern described in rat SPZ.

188

## 189 **Discussion**

190

191 In Mammals, the post-natal development of the male gonad is a complex process, during  
192 which the seminiferous tubules progressively change their size, structural organization and  
193 composition. While the first wave of spermatogenesis takes place germ cells migrate toward the  
194 base of the tubule and start their proliferation and differentiation, which will lead to the production  
195 of mature spermatozoa (SPZ), while they are nurtured and led by their association with somatic  
196 Sertoli cells (SC). Such path is also marked by a significant cytoskeletal remodelling that allows for  
197 the formation of complex structures, which allows germ cell separation (GC), protection and  
198 maintenance (Pariante et al., 2016).

199 It is well known that tubulin is one of the key factors involved in these processes, through the  
200 regulation of its polymerization and stabilization. Among its many roles, the protein is important in  
201 SC for the formation of their wide cytoplasmic protrusions (Lie et al., 2010), which follow  
202 differentiating GC toward the lumen. In particular, in SC cytoplasm, the microtubules are orientated  
203 in linear arrays parallel to the long axis of the cell (Vogl et al., 1995). Microtubules are evident in  
204 the lateral processes surrounding round and elongating spermatids (SPT) (Amlani and Vogl, 1988;  
205 Vogl, 1988;) and they show complex changes as germ cells progress through the various stages of  
206 seminiferous cycle (Vogl et al., 2008).

207 It is also known that prolyl endopeptidase (PREP), a serine protease enzyme able to digest small  
208 peptides and involved in several physiological and pathological processes, has been associated to  
209 microtubules, and in particular with the C-terminus of  $\alpha$ -tubulin, suggesting that this endopeptidase  
210 may be involved in microtubule-associate processes, independent of its peptidase activity (Schulz et  
211 al., 2005). Many studies showed that the protein may have a very important role in the central  
212 nervous system (Mentlein, 1988; Wilk, 1983), but it has been also involved in the physiology of  
213 other districts, as well as reproductive organs. Indeed, PREP was originally found as an oxytocin-  
214 cleaving enzyme in human uterus (Walter et al., 1971), and later implicated in male gametogenesis:  
215 it was purified from ascidian sperm (Yokosawa et al., 1983); then the protein was isolated from  
216 herring testis (Yoshida et al. 1999). Then, PREP was localized in mouse spermatids and SPZ and it  
217 was hypothesized that it may be involved in sperm motility (Kimura et al., 2002). Later analyses on  
218 human showed that PREP localizes in the seminiferous tubules and Leydig cells and proposed that  
219 it may participate in regulating the levels of seminal TRH analogues, mediating death associated  
220 with necrozoospermia (Valdivia et al., 2004; Myöhänen et al., 2012). Finally, in our previous work  
221 (Dotolo et al., 2016) we studied the effects of PREP knockdown on testis and sperm in adult mice,  
222 showing that the enzyme is indeed needed for a correct reproductive function and that its absence



223 leads to marked alterations of the gonads and, ultimately, gametes. All these reports suggest that  
224 PREP might have an active role in male reproductive function. In the present study, in order to  
225 improve upon the current knowledge, we investigate the possible association of PREP with the  
226 morphogenetic changes which occur during the post-natal development of rat testis, choosing a time  
227 frame ranging from 7 to 60 days post-partum, which represents the first wave of spermatogenesis.  
228 The first, encouraging evidence comes from the Western Blot expression data: PREP is, indeed,  
229 expressed in the developing and adult testis. The successive localization analysis highlighted that  
230 the protein localizes in the cytoplasm of proliferating SC during all the stages of development. It is  
231 worthy of note the congruence between PREP profile and tubulin distribution in SC protrusions,  
232 which surround the GC. It is well known that GC translocation, and in particular that of SPT,  
233 through the seminiferous epithelium occurs via microtubules-based transport of the apical  
234 ectoplasmic specialization (ES), a structural connection between SC and differentiating GC (Su et  
235 al., 2013). It has been proposed that the microtubules in this process act as a “rail” for the re-  
236 localization of cellular contents, as well as of translocation of SPT, which is obtained by the gliding  
237 of the entire ES structure together with attached SPT along microtubules within SC (Lie et al.,  
238 2010). As said before, PREP has been associated with the C-terminus of  $\alpha$ -tubulin, this  
239 information, coupled with our result, may suggest a possible involvement of PREP in such  
240 cytoskeletal remodelling.

241 On the other hand, we detected PREP presence inside the proliferating and differentiating GC  
242 during the first wave of spermatogenesis. Spermatogonia are immature GC which undergo a series  
243 mitosis to give rise to a pool of cells that enter in meiosis: I and then II spermatocytes. It has been  
244 already reported that PREP inhibition suppressed the growth of human neuroblastoma cell (Matsuda  
245 et al., 2013) and that it may be a positive regulator of cell cycle progression in human gastric cancer  
246 cell (Suzuki et al., 2014). More recently, PREP was found in various cell types in both the  
247 cytoplasm and nuclei in mouse whole-body sections, in co-localization with Ki-67, a proliferation  
248 marker protein, suggesting its role in cell proliferation (Myöhänen et al., 2012). Here we can  
249 hypothesize that PREP may be involved in the meiotic and post-meiotic phases of GC  
250 differentiation. Our supposition is corroborated by the co-localization of this peptidase with tubulin:  
251 as well known, microtubules are the main elements of mitotic and meiotic spindles, which help the  
252 division of chromosomes/chromatids into the two daughter cells.

253 During spermiogenesis and in adult testis, PREP co-localize with tubulin in the cytoplasm of  
254 haploid round and elongating SPT. This may correlate either with the aforementioned physiological  
255 activity of SC, which maintain and hold the spermatids until their release during spermiation, or  
256 with spermiogenesis itself, during which PREP may be needed for the correct organization and

257 differentiation of SPT. In fact, dynamic microtubules are essential for the assembly of microtubule-  
258 based structures that participate in SPT remodelling and physiology, such as the manchette and the  
259 sperm flagella. Thus, such wide distribution may hint at a possible function for PREP, due not only  
260 of its enzymatic activity, which could led to the degradation and maturation of small active  
261 molecules involved in the process, but also with its association with microtubules and its  
262 involvement in all microtubules- associated processes which take place during the spermatogenesis.  
263 It is interesting to note, that the endopeptidase is clearly detectable in the tail of isolated epididymal  
264 and human SPZ, as well as tubulin, which suggests that the PREP may be involved in mature sperm  
265 function. Our data, which match with those found in our previous work by Dotolo et al. (2016) in  
266 mouse sperm, let us to hypothesize a possible role of the enzyme in mammalian sperm motility: as  
267 known, the process is driven by the release and uptake of calcium by intracellular stores (Herrick et  
268 al., 2005; Ho and Suarez, 2003), and being PREP a possible regulator of the pathway of inositol  
269 1,4,5 which results in the modulation of cytosolic calcium level (Szeltner and Polgár, 2008) we  
270 suggest that PREP, through its involvement in calcium signalling, might be an actor in the  
271 regulation of sperm movement and progression. As known, the motility is generated by the internal  
272 cytoskeletal structure called axoneme, a highly organized microtubule-based structure constructed  
273 from approximately 250 proteins that has been well conserved through evolution (Inaba, 2003). In  
274 this case, PREP may have a double function in sperm motility: one regarding the aforementioned  
275 modulation of cytosolic calcium level, and the other concerning the regulation of the pivotal role  
276 that has the tubulin in the progression of the sperm movement.

277 Thus, our data strongly support the hypothesis that PREP could be considered as a useful marker in  
278 further studies aimed at the observation of the reproductive function and the physiological sperm  
279 motility, if enhanced for such purpose, due to its wide distribution in the cytoplasm of SC, GC and  
280 in the flagellum of mammalian SPZ.

281 In conclusion, our work shows the expression and the localization of PREP during rat  
282 spermatogenesis and in rat and human SPZ. Although the exact functions of this enzyme remain to  
283 be elucidated, it is clear that PREP is involved in spermatogenetic events. The results here described  
284 represent a starting point to understand and define the effective role of the endopeptidase in  
285 mammalian reproduction, in order to be able to use PREP as a marker of a good quality of the  
286 gamete physiology.

287

288 The authors declare no conflict of interest

289 Contract grant sponsor: “Ricerca di Ateneo” Università degli Studi della Campania “Luigi  
290 Vanvitelli”.

291 **Literature Cited**

292

293 **Ahmed, M.M., Ariif M., Chikuma, T. and Kato, T.** (2005). Pentylentetrazol-induced seizures  
294 affect the levels of prolyl oligopeptidase, thimet oligopeptidase and glial proteins in rat brain  
295 regions, and attenuation by MK-801 pretreatment. *Neurochem. Int.* **47**:248-59.

296

297 **Amlani, S. and Vogl, A.W.** (1988). Changes in the distribution of microtubules and intermediate  
298 filaments in mammalian Sertoli cells during spermatogenesis. *Anat. Rec.* **220**:143-60.

299

300 **Bär, J.W., Rahfeld, J.U., Schulz, I., Gans, K., Ruiz-Carrillo, D., Manhart, S., Rosche, F. and**  
301 **Demuth, H.U.** (2006). Prolyl endopeptidase cleaves the apoptosis rescue peptide humanin and  
302 exhibits an unknown post-cysteine cleavage specificity. *Adv. Exp. Med. Biol.* **575**:103-8.

303

304 **Comino, I., Moreno Mde, L., Real, A., Rodríguez-Herrera, A., Barro, F. and Sousa C.** (2013).  
305 The gluten-free diet: testing alternative cereals tolerated by celiac patients. *Nutrients* **5**:4250-68.

306

307 **Conde, C. and Cáceres, A.** (2009). Microtubule assembly, organization and dynamics in axons and  
308 dendrites. *Nat Rev Neurosci.* **10**:319-32.

309

310 **D'Agostino, G., Kim, J.D., Liu, Z.W., Jeong, J.K., Suyama, S., Calignano, A., Gao, X.B.,**  
311 **Schwartz, M. and Diano, S.** (2013). Prolyl endopeptidase-deficient mice have reduced synaptic  
312 spine density in the CA1 region of the hippocampus, impaired LTP, and spatial learning and  
313 memory. *Cereb. Cortex* **23**:2007-14.

314

315 **Dotolo, R., Kim, J.D., Pariante, P., Minucci, S. and Diano, S.** (2016). Prolyl Endopeptidase  
316 (PREP) is associated with male reproductive functions and gamete physiology in mice. *J. Cell.*  
317 *Physiol.* **231**:551-7.

318

319 **Hannula, M.J., Myöhänen, T.T., Tenorio-Laranga, J., Männistö, P.T. and Garcia-Horsman,**  
320 **J.A.** (2013). Prolyl oligopeptidase colocalizes with  $\alpha$ -synuclein,  $\beta$ -amyloid, tau protein and astroglia  
321 in the post-mortem brain samples with Parkinson's and Alzheimer's diseases. *Neuroscience*  
322 **242**:140-50.

323

324 **Helmke, K.J., Heald, R. and Wilbur, J.D.** (2013). Interplay between spindle architecture and  
325 function. *Int. Rev. Cell. Mol. Biol.* **306**:83-125.

326

327 **Herrick, S.B., Schweissinger, D.L., Kim, S.W., Bayan, K.R., Mann, S. and Cardullo, R.A.**  
328 (2005). The acrosomal vesicle of mouse sperm is a calcium store. *J Cell Physiol* **202**:663-71.

329

330 **Ho, H.C. and Suarez, S.S.** (2003). Characterization of the intracellular calcium store at the base of  
331 the sperm flagellum that regulates hyperactivated motility. *Biol Reprod* **68**:1590-6.

332

333 **Inaba, K.** (2003). Molecular architecture of the sperm flagella: molecules for motility and  
334 signaling. *Zoolog Sci.* **20**:1043-56.

335

336 **Irazusta, J., Larrinaga, G., González-Maeso, J., Gil, J., Meana, J.J. and Casis, L.** (2002).  
337 Distribution of prolyl endopeptidase activities in rat and human brain. *Neurochem Int* **40**:337-45.

338

339 **Jordan, M.A. and Wilson, L.** (2004). Microtubules as a target for anticancer drugs. *Nat Rev*  
340 *Cancer.* **4**:253-65.

341

342 **Kim, J.D., Toda, C., D'Agostino, G., Zeiss, C.J., DiLeone, R.J., Elsworth, J.D., Kibbey, R.G.,**  
343 **Chan, O., Harvey, B.K., Richie, C.T., Savolainen, M., Myöhänen, T., Jeong, J.K. and Diano,**  
344 **S.** 2014. Hypothalamic prolyl endopeptidase (PREP) regulates pancreatic insulin and glucagon  
345 secretion in mice. *Proc Natl Acad Sci* **111**:11876-81.

346

- 347 **Kimura, A., Ohnishi, J., Okimura, H., Hamabata, T. and Takahashi, T.** (1998). Localization of  
348 prolyl endopeptidase mRNA in small growing follicles of porcine ovary. *Mol. Reprod. Dev.*  
349 **50**:121-7.
- 350
- 351 **Kimura, A., Matsui, H. and Takahashi, T.** (2002). Expression and localization of prolyl  
352 oligopeptidase in mouse testis and its possible involvement in sperm motility. *Zoolog. Sci.* **19**:93-  
353 102.
- 354
- 355 **Lie, P.P.Y., Mruk, D.D., Lee, W.M. and Cheng, C.Y.** (2010). Cytoskeletal dynamics and  
356 spermatogenesis. *Philos. Trans. R. Soc. Lond. B. Biol. Sci.* **365**:1581–1592.
- 357
- 358 **Matsubara, Y., Ono, T., Tsubuki, S., Irie, S. and Kawashima, S.** (1998). Transient up-regulation  
359 of a prolyl endopeptidase activity in the microsomal fraction of rat liver during postnatal  
360 development. *Eur. J. Biochem.* **252**:178-83.
- 361
- 362 **Matsuda, T., Sakaguchi, M., Tanaka, S., Yoshimoto, T. and Takaoka, M.** (2013). Prolyl  
363 oligopeptidase is a glyceraldehyde-3-phosphate dehydrogenase-binding protein that regulates  
364 genotoxic stress-induced cell death. *Int. J. Biochem. Cell. Biol.* **45**:850-7.
- 365
- 366 **Mentlein, R.** (1988). Proline residues in the maturation and degradation of peptide hormones and  
367 neuropeptides. *FEBS. Lett.* **234**:251-6.
- 368
- 369 **Morawski, M., Schulz, I., Zeitschel, U., Blosa, M., Seeger, G. and Rossner, S.** (2011). Role of  
370 prolyl endopeptidase in intracellular transport and protein secretion. *CNS. Neurol. Disord. Drug*  
371 *Targets*.**10**:327-32.
- 372
- 373 **Myöhänen, T.T., Pyykkö, E., Männistö, P.T. and Carpen, O.** (2012). Distribution of prolyl  
374 oligopeptidase in human peripheral tissues and in ovarian and colorectal tumors. *J. Histochem.*  
375 *Cytochem.* **60**:706-15.

376

377 **Pariante, P., Dotolo, R., Venditti, M., Ferrara, D., Donizetti, A., Aniello, F. and Minucci, S.**  
378 (2016). First Evidence of DAAM1 Localization During the Post-Natal Development of Rat Testis  
379 and in Mammalian Sperm. *J. Cell. Physiol.* **231**:2172-84.

380

381 **Picut, C.A., Remick, A.K., de Rijk, E.P., Simons, M.L., Stump, D.G. and Parker, G.A.** (2015)  
382 Postnatal development of the testis in the rat: morphologic study and correlation of morphology to  
383 neuroendocrine parameters. *Toxicol. Pathol.* **43**:326-42.

384

385 **Rea, D. and Fülöp, V.** (2006). Structure-function properties of prolyl oligopeptidase family  
386 enzymes. *Cell. Biochem. Biophys.* **44**:349-65.

387

388 **Rossner, S., Schulz, I., Zeitschel, U., Schliebs, R., Bigl, V. and Demuth, H.U.** (2005). Brain  
389 prolyl endopeptidase expression in aging, APP transgenic mice and Alzheimer's disease.  
390 *Neurochem. Res.* **30**:695-702.

391

392 **Schulz, I., Zeitschel, U., Rudolph, T., Ruiz-Carrillo, D., Rahfeld, J.U., Gerhartz, B., Bigl, V.,**  
393 **Demuth, H.U. and Rossner, S.** (2005). Subcellular localization suggests novel functions for prolyl  
394 endopeptidase in protein secretion. *J. Neurochem.* **94**:970-9.

395

396 **Siegel, M., Bethune, M.T., Gass, J., Ehren, J., Xia, J., Johannsen, A., Stuge, T.B., Gray, G.M.,**  
397 **Lee, P.P. and Khosla, C.** (2006). Rational design of combination enzyme therapy for celiac sprue.  
398 *Chem. Biol.* **13**:649-58.

399

400 **Su, W., Mruk, D.D. and Cheng, C.Y.** (2013). Regulation of actin dynamics and protein trafficking  
401 during spermatogenesis--insights into a complex process. *Crit. Rev. Biochem. Mol. Biol.* **48**:153-  
402 72.

403

- 404 **Suzuki, K., Sakaguchi, M., Tanaka, S., Yoshimoto, T. and Takaoka, M.** (2014). Prolyl  
405 oligopeptidase inhibition-induced growth arrest of human gastric cancer cells. *Biochem. Biophys.*  
406 *Res. Commun.* **443**:91-6.
- 407
- 408 **Szeltner, Z. and Polgár, L.** (2008). Structure, function and biological relevance of prolyl  
409 oligopeptidase. *Curr. Protein. Pept. Sci.* **9**:96-107.
- 410
- 411 **Taylor, W.L., Andrews, P.C., Henrikson, C.K. and Dixon, J.E.** (1980). New fluorogenic  
412 substrates for a rat brain proline endopeptidase. *Anal. Biochem.* **105**:58-64.
- 413 **Valdivia, A., Irazusta, J., Fernández, D., Múgica, J., Ochoa, C. and Casis, L.** (2004)  
414 Pyroglutamyl peptidase I and prolyl endopeptidase in human semen: increased activity in  
415 necrozoospermia. *Regul. Pept.* **122**:79-84.
- 416
- 417 **Venäläinen, J.I., Juvonen, R.O. and Männistö, P.T.** (2004). Evolutionary relationships of the  
418 prolyl oligopeptidase family enzymes. *Eur. J. Biochem.* **271**:2705-15.
- 419
- 420 **Venditti, M. and Minucci, S.** (2017). Prothymosin alpha expression in the vertebrate testis: a  
421 comparative review. *Zygote*; **25**:760-770.
- 422
- 423 **Venditti, M., Fasano, C., Santillo, A., Aniello, F. and Minucci, S.** 2018). First evidence of  
424 DAAM1 localization in mouse seminal vesicles and its possible involvement during regulated  
425 exocytosis. *C. R. Biol.* doi: 10.1016/j.crv.2018.03.001.
- 426
- 427 **Vogl, A.W.** (1988). Changes in the distribution of microtubules in rat Sertoli cells during  
428 spermatogenesis. *Anat. Rec.* **222**:34-41.
- 429
- 430 **Vogl, A.W., Vaid, K.S. and Guttman, J.A.** (2008). The Sertoli cell cytoskeleton. *Adv. Exp. Med.*  
431 *Biol.* **636**:186-211.

432

433 **Vogl, A.W., Weis, M. and Pfeiffer, D.C.** (1995). The perinuclear centriole-containing centrosome  
434 is not the major microtubule organizing center in Sertoli cells. *Eur. J. Cell. Biol.* **66**:165-79.

435

436 **Walter, R., Shlank, H., Glass, J.D., Schwartz, I.L. and Kerenyi, T.D.** (1971).  
437 Leucylglycinamide released from oxytocin by human uterine enzyme. *Science* **173**:827–829.

438

439 **Wilk, S.** (1983). Prolyl endopeptidase. *Life Sci.* **33**:2149-57.

440

441 **Yokosawa, H., Miyata, M., Sawada, H. and Ishii, S.** (1983). Isolation and characterization of a  
442 post-proline cleaving enzyme and its inhibitor from sperm of the ascidian, *Halocynthia roretzi*. *J.*  
443 *Biochem.* **94**:1067–1076.

444

445 **Yoshida, K., Inaba, K., Ohtake, H. and Morisawa, M.** (1999). Purification and characterization  
446 of prolyl endopeptidase from the Pacific herring, *Clupea pallasii*, and its role in the activation of  
447 sperm motility. *Dev. Growth. Differ.* **41**:217-25.

448

449 **Yoshimoto, T., Ogita, K., Walter, R., Koida, M. and Tsuru, D.** 1979. Post-proline cleaving  
450 enzyme. Synthesis of a new fluorogenic substrate and distribution of the endopeptidase in rat tissues  
451 and body fluids of man. *Biochim Biophys Acta* **569**:184-92.

452

453

454

455

456

457

458



## 459 **Figure Legends**

460

461 Fig. 1. Histology and staging of the developing rat testis. Haematoxylin-eosin staining of tissue  
462 sections at 7 (A), 14 (B), 21 (C), 28 (D), 35 (E), 42 (F), 60 (G and H) dpp, in which the most  
463 representative cell types are highlighted (for review see Picut et al., 2014). Pointer legend is  
464 provided in the bottom-right table. PT cells: Peritubular cells; SPG: Spermatogonia; SC: Sertoli  
465 cells; PL SPC: Pre-leptotene primary Spermatocytes; L/Z: Leptotene/Zygotene; P: Pachytene;  
466 RSPT: Round Spermatids; ESPT: Elongating Spermatids; SPZ: Spermatozoa. Scale bars represent  
467 20  $\mu$ m.

468 Fig. 2. Expression of PREP and Tubulin during the post-natal development of rat testis. Western  
469 blot analysis which shows the expression of PREP (81 KDa, top section) and Tubulin (50 KDa,  
470 bottom section) during rat post-natal development, at 7,14,21,28,35,42, and 60 days post-partum  
471 (dpp). The two proteins are always expressed.

472 Fig. 3. Localization of PREP during the post-natal development of rat testis, part 1 (7-28 dpp). A,  
473 D, G, J. DAPI-fluorescent nuclear staining (blue) and PNA lectin acrosome staining (red). B, E, H,  
474 K. PREP fluorescence (green). C, F, I, L, M, N, O, P. Merged fluorescent channels (blue/red/green).  
475 A, B, C. 7 dpp testis; PREP-positive fluorescence is detectable in the central region of the maturing  
476 tubules, as well as in the Sertoli cells cytoplasm. D, E, F. 14 dpp; fluorescent signal is present in  
477 spermatogonia and Sertoli cells. G, H, I. 21 dpp; J, K, L. 28 dpp; positive cells now include meiotic  
478 spermatocytes; Sertoli cells are not positive; insets show primary spermatocytes at different stages.  
479 At 28 dpp the acrosome formation starts to be visible through PNA-lectin staining. M, N, O, P.  
480 Negative controls for the same time points, obtained by omitting the primary antibody. Scale bars  
481 represent 20  $\mu$ m, except for the insets, where they represent 10  $\mu$ m. PNA: PNA lectin staining. bg:  
482 Background/autofluorescence. nc: Negative controls. For cell-type pointer legend, see table in Fig.  
483 1.

484 Fig. 4. Localization of PREP during the post-natal development of rat testis, part 2 (35-60 dpp). A,  
485 D, G. DAPI-fluorescent nuclear staining (blue) and PNA lectin acrosome staining (red). B, E, H.  
486 PREP fluorescence (green). C, F, I, J, K, L. Merged fluorescent channels (blue/red/green). A, B, C.  
487 35 dpp testis; D, E, F. 42 dpp; DAAM1 is detectable in spermatocytes and spermatids, where the  
488 acrosome signal is evident. G, H, I. 60 dpp; all cell types are positive; the cytoplasmic droplet is  
489 especially notable; insets show round spermatids (35 dpp), elongating spermatids (42 dpp) and  
490 spermatozoa (60 dpp). J, K, L. Negative controls for the same time points, obtained by omitting the

491 primary antibody. Scale bars represent 20  $\mu\text{m}$ , except for the insets, where they represent 10  $\mu\text{m}$ .  
492 PNA: PNA lectin staining. bg: Background/autofluorescence. nc: Negative controls. For cell-type  
493 pointer legend, see table in Fig. 1.

494 Fig. 5. Co-localization of PREP and Tubulin during the post-natal development of rat testis, part 1  
495 (7-28 dpp). A, D, G, J. DAPI-fluorescent nuclear staining (blue) and Tubulin staining (red). B, E, H,  
496 K. PREP fluorescence (green). C, F, I, L, M, N, O, P. Merged fluorescent channels (blue/red/green).  
497 A, B, C. 7 dpp testis; D, E, F. 14 dpp; G, H, I. 21 dpp; J, K, L. 28 dpp. Tubulin signal is strong in all  
498 samples, especially in the cytoplasm of Sertoli cells. M, N, O, P. Negative controls for the same  
499 time points, obtained by omitting the primary antibody. Scale bars represent 20  $\mu\text{m}$ . TUB: Tubulin.  
500 bg: Background/autofluorescence. nc: Negative controls. For cell-type pointer legend, see table in  
501 Fig. 1.

502 Fig. 6. Co-localization of PREP and Tubulin during the post-natal development of rat testis, part 2  
503 (35-60 dpp). A, D, G. DAPI-fluorescent nuclear staining (blue) and Tubulin staining (red). B, E, H.  
504 PREP fluorescence (green). C, F, I, J, K, L. Merged fluorescent channels (blue/red/green). A, B, C.  
505 35 dpp testis; D, E, F. 42 dpp; G, H, I. 60 dpp; Immunopositivity is observed in Sertoli cells  
506 cytoplasm protrusions from the base to the lumen of the tubules, and in cell-cell junctions. In  
507 mature testes, the signal also appears in SPZ. J, K, L. Negative controls for the same time points,  
508 obtained by omitting the primary antibody. Scale bars represent 20  $\mu\text{m}$ . PNA: PNA lectin staining.  
509 TUB: Tubulin. bg: Background/autofluorescence. nc: Negative controls. For cell-type pointer  
510 legend, see table in Fig. 1.

511 Fig. 7. Expression of PREP and Tubulin in rat and human spermatozoa. Western blot analysis on  
512 protein extract from rat (lane 1) and human (lane 2) SPZ. PREP (81 KDa, top section) and Tubulin  
513 (50 KDa, bottom section) are present in both the samples.

514 Fig. 8. Co-localization of PREP and Tubulin in rat spermatozoa. A: DAPI-fluorescent nuclear  
515 staining (blue) and PNA lectin acrosome staining (red). B: Fluorescent signal of Tubulin (red). C-D:  
516 Fluorescent signal of PREP (green). E-F: Merged fluorescent channels (blue/red/green) including  
517 either PREP or Tubulin, respectively. C-F: PREP is clearly detectable in the flagellum. B: Tubulin  
518 marks the region of the tail. F: PREP and Tubulin co-localize inside the flagellum. G-H: Negative  
519 controls for PREP or Tubulin, obtained by omitting the primary antibodies. Scale bars represent 10  
520  $\mu\text{m}$ . PNA: PNA lectin staining. bg: Background/autofluorescence.

521 Fig. 9. Co-localization of PREP and Tubulin in human spermatozoa. A: DAPI-fluorescent nuclear  
522 staining (blue) and PNA lectin acrosome staining (red). B: Fluorescent signal of Tubulin (red). C-D:

523 Fluorescent signal of PREP (green). E-F: Merged fluorescent channels (blue/red/green) including  
524 either DAAM1 or Tubulin, respectively. C-E: PREP is clearly detectable in the flagellum, with a  
525 weaker signal in the midpiece. B: Tubulin marks the region of the tail. F: PREP and Tubulin co-  
526 localize inside the flagellum. G-H: Negative controls for PREP or Tubulin, obtained by omitting the  
527 primary antibodies. Scale bars represent 10  $\mu\text{m}$ . PNA: PNA lectin staining. bg:  
528 Background/autofluorescence.

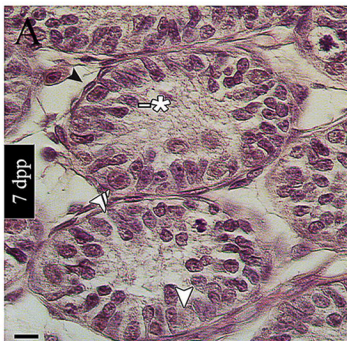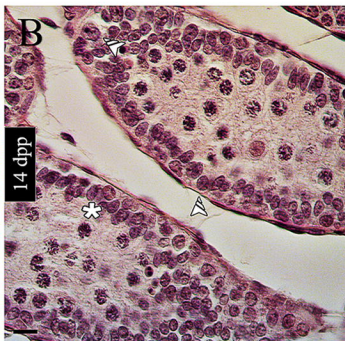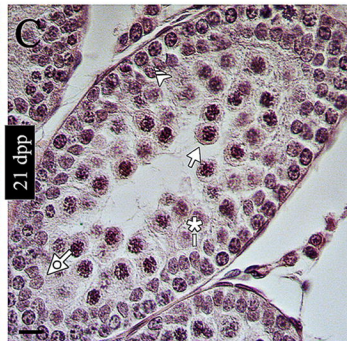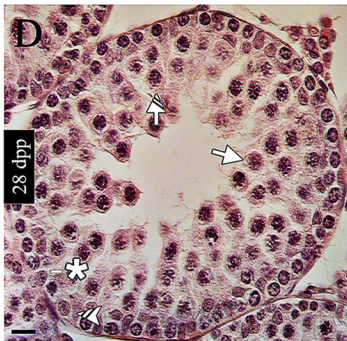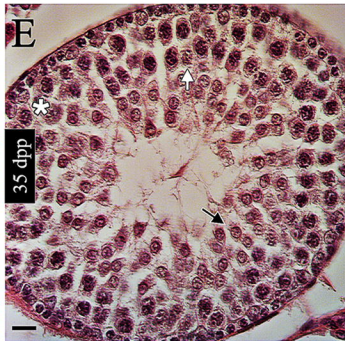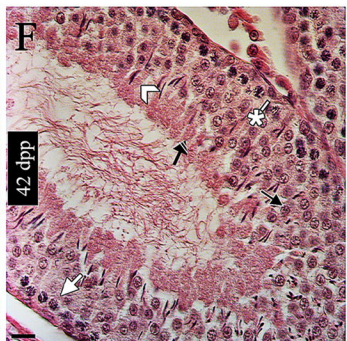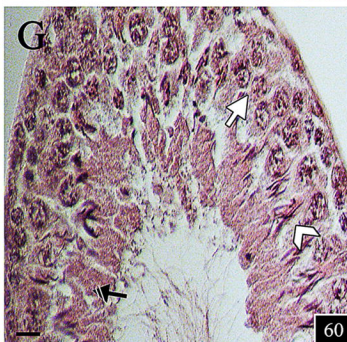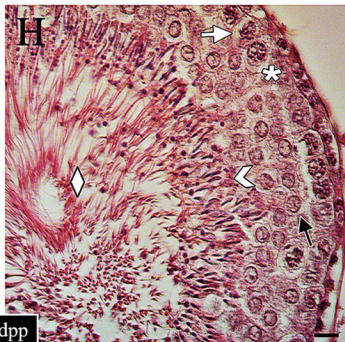

|   |                |
|---|----------------|
| ▲ | PT cells       |
| △ | Gonocytes      |
| ▽ | A/B SPG        |
| * | SC cytoplasm   |
| ⬆ | PL             |
| ⬆ | L/Z SPC        |
| ⬆ | P SPC          |
| ⬆ | RSPT           |
| ⬆ | ESPT cytoplasm |
| ⊂ | ESPT/SPZ head  |
| ◇ | tail           |

rat testis development (dpp)

7 | 14 | 21 | 28 | 35 | 42 | 60

PREP

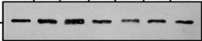

TUBULIN

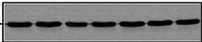

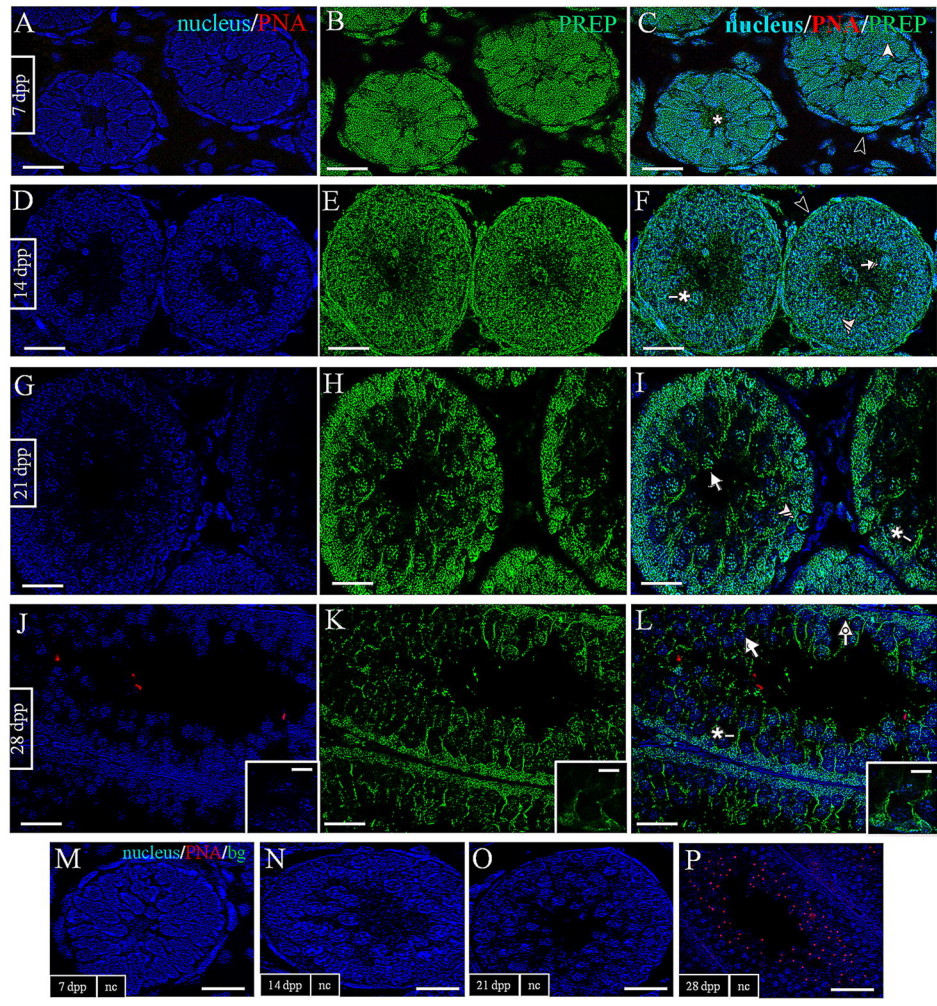

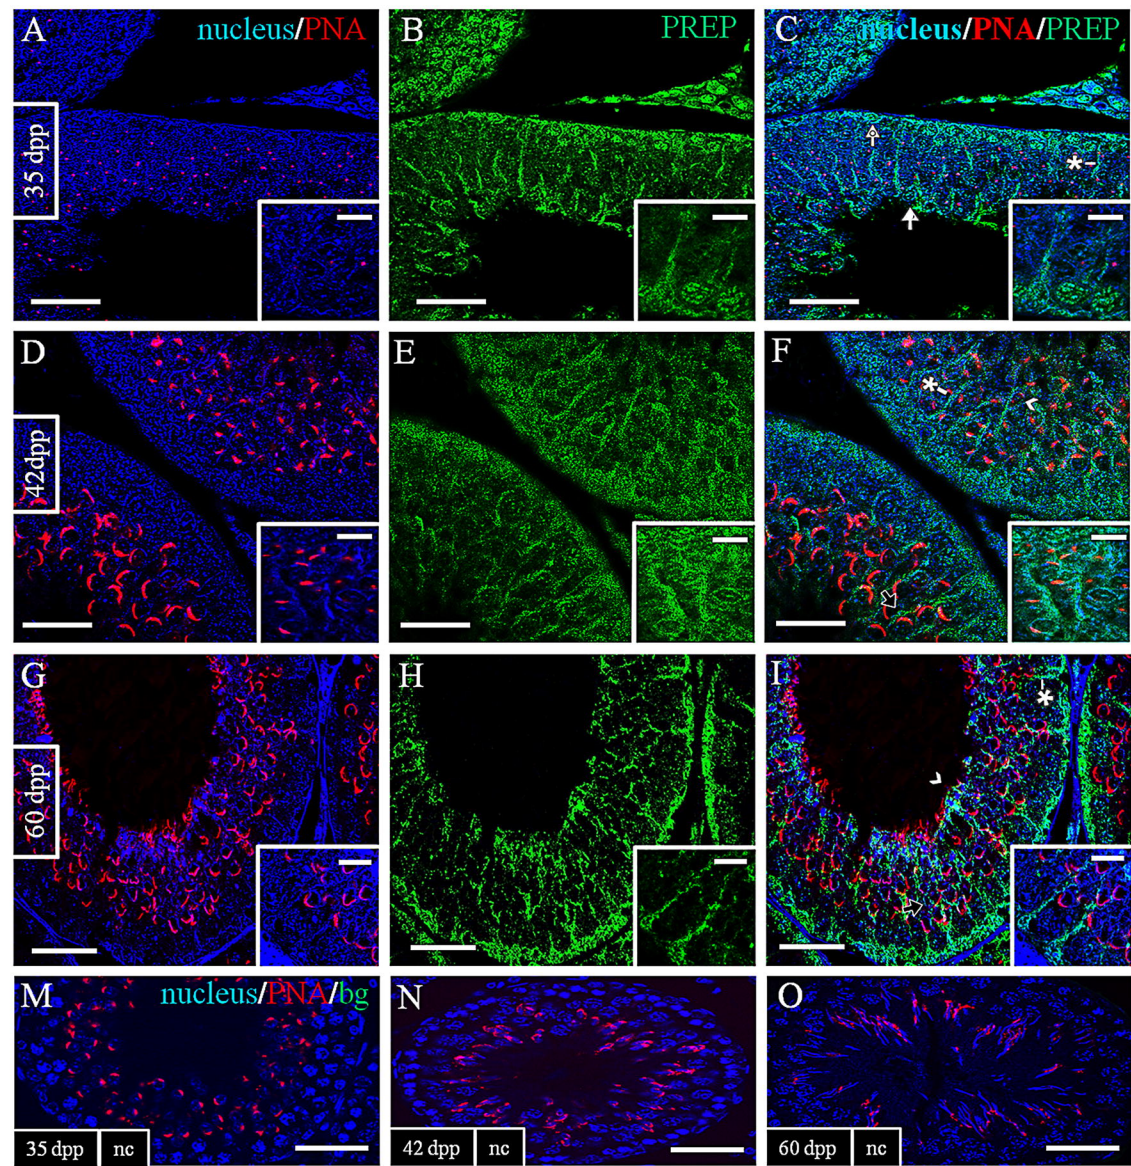

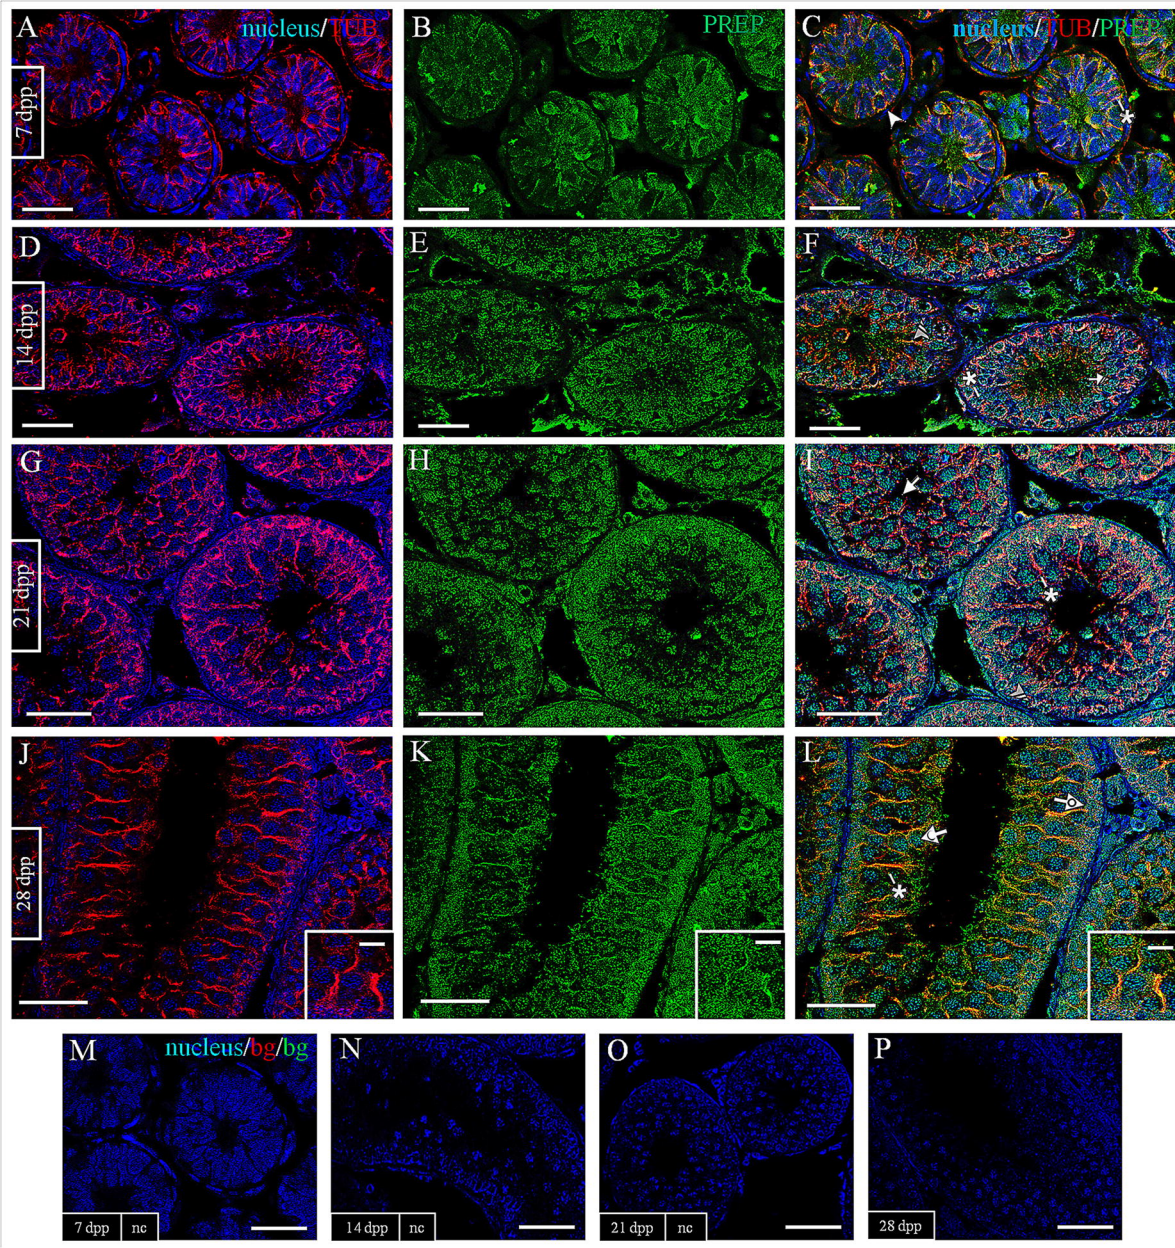



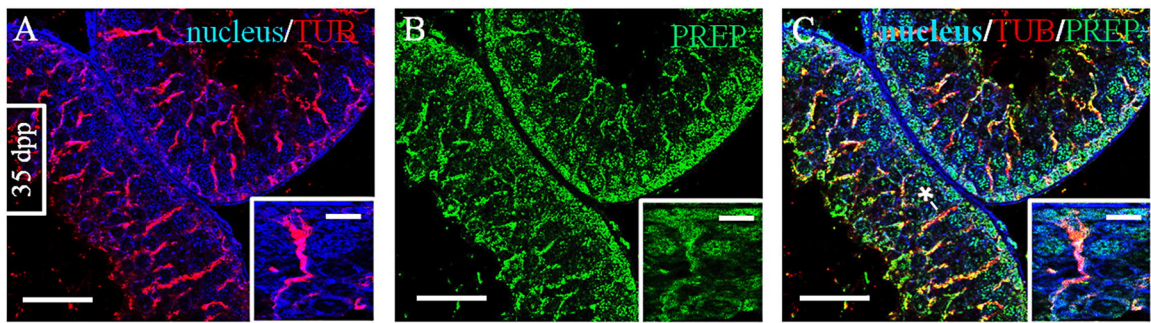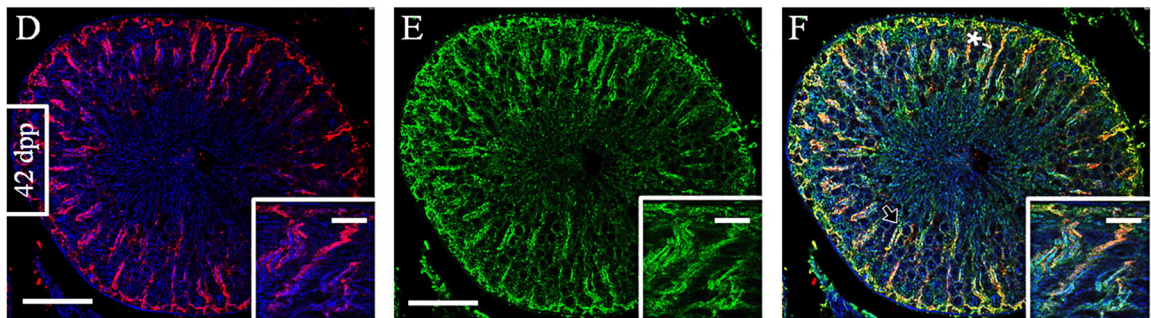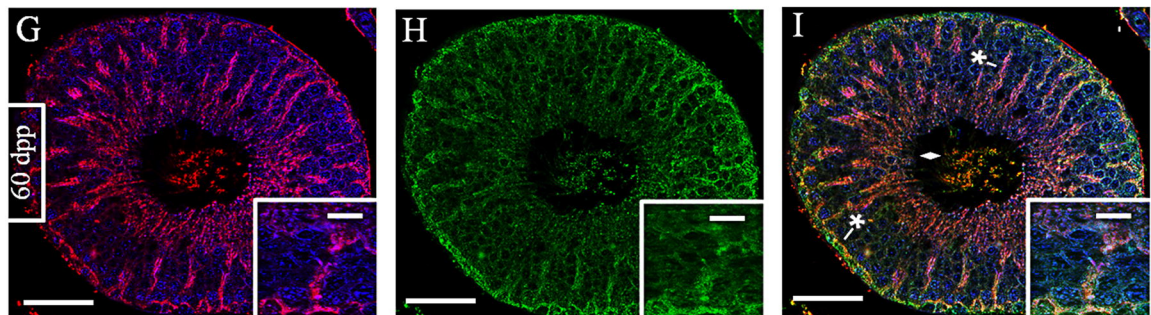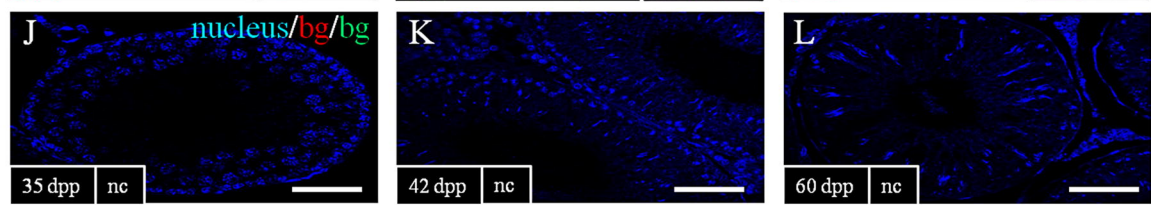

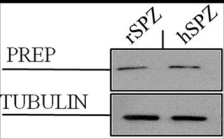

ASPZ

ASPZ

PREP

TUBULIN

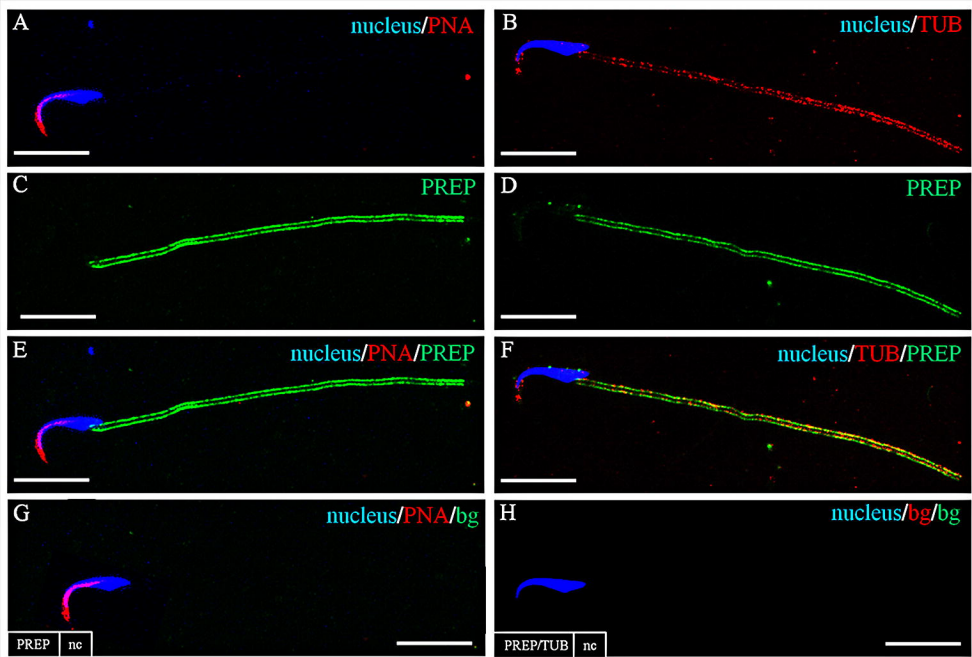

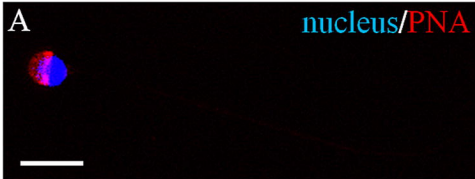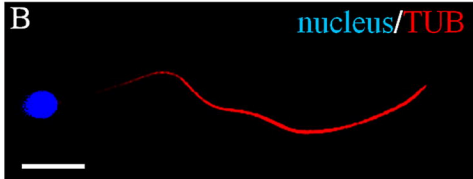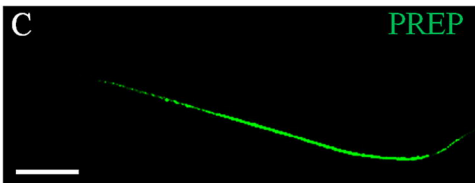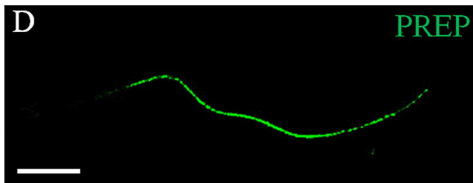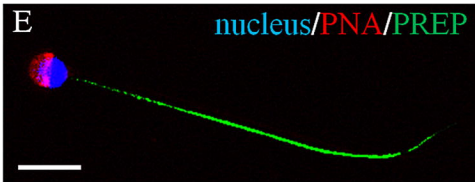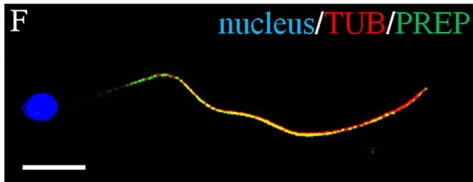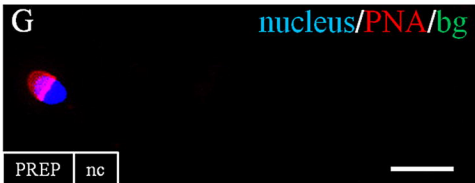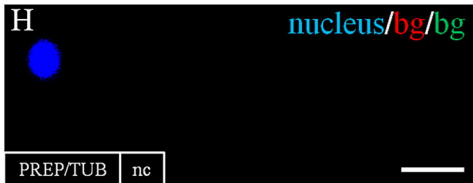

Source: https://www.biorxiv.org/content/10.1101/319491v1.full.pdf
